# Supplementary material
Source: PubMed Central journal article supplement (PMC4575543)
Supplement: Supp_Fig1.pdf [file Supp_Fig1.pdf]

## Supplementary Data

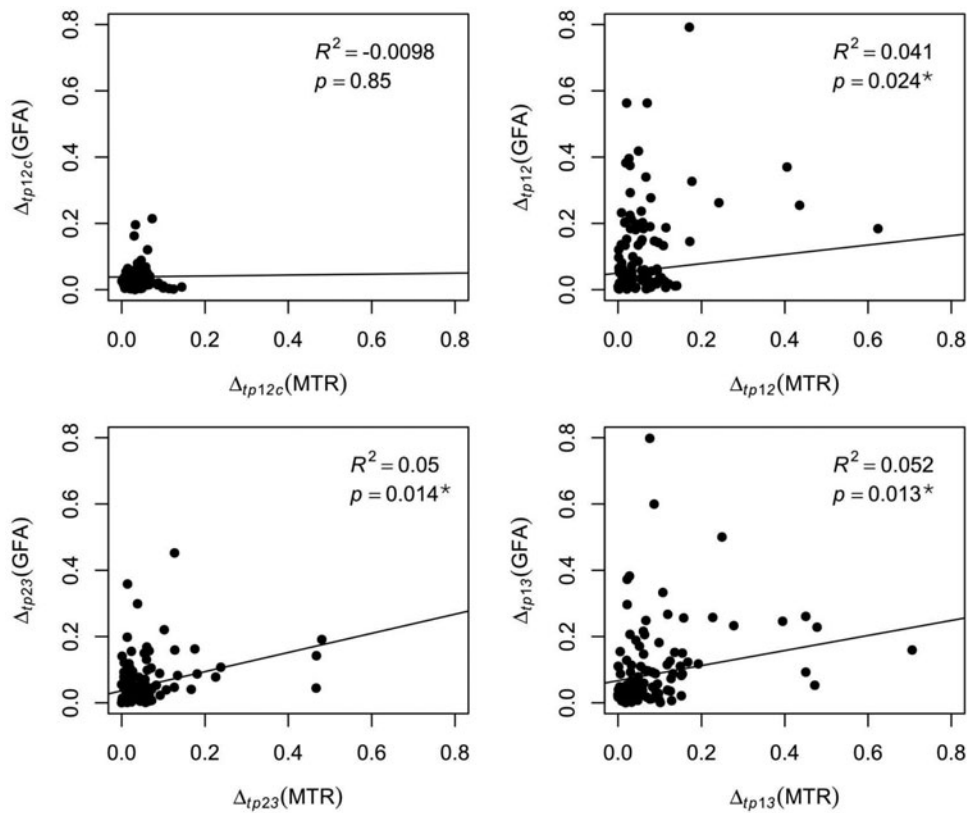

**SUPPLEMENTARY FIG. S1.** The scatter plot shows the regression correlation results between  $\Delta$ GFA and  $\Delta$ MTR (black circles) in healthy controls (top left) and patients (top right and bottom row): (i)  $\Delta_{tp12c}$  MTR in intra- and interhemispheric connections correlate with GFA changes in controls, and (ii)  $\Delta_{tp12}$ ,  $\Delta_{tp23}$ , and  $\Delta_{tp13}$  MTR in intra- and interhemispheric connections correlate with GFA change in patients.  $R^2$  = adjusted  $R$  squared;  $*p < 0.05$ . GFA, generalized fractional anisotropy; MTR, magnetization transfer ratio.
