# Supplementary material
Source: PubMed Central journal article supplement (PMC4575543)
Supplement: Supp_Table1.pdf [file Supp_Table1.pdf]

SUPPLEMENTARY TABLE S1. NORMALITY TEST FOR GFA AT TP1, TP2, AND TP3 FOR PATIENTS AND CONTROLS

| <i>Test of normality</i> |                          |          | <i>Kolmogorov-Smirnov<sup>a</sup></i> |                    |                    | <i>Shapiro-Wilk<sup>b</sup></i> |           |             |
|--------------------------|--------------------------|----------|---------------------------------------|--------------------|--------------------|---------------------------------|-----------|-------------|
|                          | <i>Controls/patients</i> |          | <i>Statistic</i>                      | <i>df</i>          | <i>Sig.</i>        | <i>Statistic</i>                | <i>df</i> | <i>Sig.</i> |
| Tp1                      | M1-SMA                   | Controls | 0.161                                 | 10                 | 0.200 <sup>c</sup> | 0.951                           | 10        | 0.677       |
|                          |                          | Patients | 0.165                                 | 10                 | 0.200 <sup>c</sup> | 0.971                           | 10        | 0.900       |
|                          | PMd-M1                   | Controls | 0.194                                 | 10                 | 0.200 <sup>c</sup> | 0.905                           | 10        | 0.246       |
|                          |                          | Patients | 0.173                                 | 10                 | 0.200 <sup>c</sup> | 0.930                           | 10        | 0.453       |
|                          | PMd-SMA                  | Controls | 0.139                                 | 10                 | 0.200 <sup>c</sup> | 0.984                           | 10        | 0.983       |
|                          |                          | Patients | 0.143                                 | 10                 | 0.200 <sup>c</sup> | 0.963                           | 10        | 0.819       |
|                          | PMd-PMv                  | Controls | 0.146                                 | 10                 | 0.200 <sup>c</sup> | 0.935                           | 10        | 0.501       |
|                          |                          | Patients | 0.126                                 | 10                 | 0.200 <sup>c</sup> | 0.971                           | 10        | 0.904       |
|                          | M1-SC                    | Controls | 0.124                                 | 10                 | 0.200 <sup>c</sup> | 0.966                           | 10        | 0.853       |
|                          |                          | Patients | 0.181                                 | 10                 | 0.200 <sup>c</sup> | 0.922                           | 10        | 0.378       |
|                          | PMv-SMA                  | Controls | 0.150                                 | 10                 | 0.200 <sup>c</sup> | 0.929                           | 10        | 0.435       |
|                          |                          | Patients | 0.200                                 | 10                 | 0.200 <sup>c</sup> | 0.946                           | 10        | 0.616       |
|                          | Inter-PMd                | Controls | 0.177                                 | 10                 | 0.200 <sup>c</sup> | 0.941                           | 10        | 0.560       |
|                          |                          | Patients | 0.203                                 | 10                 | 0.200 <sup>c</sup> | 0.938                           | 10        | 0.528       |
|                          | Inter-PMv                | Controls | 0.209                                 | 10                 | 0.200 <sup>c</sup> | 0.783                           | 10        | 0.009       |
|                          |                          | Patients | 0.238                                 | 10                 | 0.113              | 0.875                           | 10        | 0.113       |
| Inter-M1                 | Controls                 | 0.137    | 10                                    | 0.200 <sup>c</sup> | 0.971              | 10                              | 0.903     |             |
|                          | Patients                 | 0.185    | 10                                    | 0.200 <sup>c</sup> | 0.939              | 10                              | 0.538     |             |
| Inter-SMA                | Controls                 | 0.140    | 10                                    | 0.200 <sup>c</sup> | 0.956              | 10                              | 0.740     |             |
|                          | Patients                 | 0.178    | 10                                    | 0.200 <sup>c</sup> | 0.953              | 10                              | 0.698     |             |
| Tp2                      | M1-SMA                   | Controls | 0.152                                 | 10                 | 0.200 <sup>c</sup> | 0.940                           | 10        | 0.549       |
|                          |                          | Patients | 0.182                                 | 10                 | 0.200 <sup>c</sup> | 0.937                           | 10        | 0.520       |
|                          | PMd-M1                   | Controls | 0.164                                 | 10                 | 0.200 <sup>c</sup> | 0.902                           | 10        | 0.228       |
|                          |                          | Patients | 0.144                                 | 10                 | 0.200 <sup>c</sup> | 0.959                           | 10        | 0.772       |
|                          | PMd-SMA                  | Controls | 0.192                                 | 10                 | 0.200 <sup>c</sup> | 0.900                           | 10        | 0.221       |
|                          |                          | Patients | 0.195                                 | 10                 | 0.200 <sup>c</sup> | 0.949                           | 10        | 0.652       |
|                          | PMd-PMv                  | Controls | 0.152                                 | 10                 | 0.200 <sup>c</sup> | 0.945                           | 10        | 0.607       |
|                          |                          | Patients | 0.143                                 | 10                 | 0.200 <sup>c</sup> | 0.949                           | 10        | 0.656       |
|                          | M1-SC                    | Controls | 0.146                                 | 10                 | 0.200 <sup>c</sup> | 0.962                           | 10        | 0.806       |
|                          |                          | Patients | 0.196                                 | 10                 | 0.200 <sup>c</sup> | 0.929                           | 10        | 0.435       |
|                          | PMv-SMA                  | Controls | 0.153                                 | 10                 | 0.200 <sup>c</sup> | 0.958                           | 10        | 0.767       |
|                          |                          | Patients | 0.183                                 | 10                 | 0.200 <sup>c</sup> | 0.929                           | 10        | 0.441       |
|                          | Inter-PMd                | Controls | 0.142                                 | 10                 | 0.200 <sup>c</sup> | 0.970                           | 10        | 0.893       |
|                          |                          | Patients | 0.121                                 | 10                 | 0.200 <sup>c</sup> | 0.978                           | 10        | 0.954       |
|                          | Inter-PMv                | Controls | 0.239                                 | 10                 | 0.111              | 0.929                           | 10        | 0.436       |
|                          |                          | Patients | 0.158                                 | 10                 | 0.200 <sup>c</sup> | 0.933                           | 10        | 0.480       |
| Inter-M1                 | Controls                 | 0.114    | 10                                    | 0.200 <sup>c</sup> | 0.981              | 10                              | 0.969     |             |
|                          | Patients                 | 0.281    | 10                                    | 0.024              | 0.664              | 10                              | 0.000     |             |
| Inter-SMA                | Controls                 | 0.180    | 10                                    | 0.200 <sup>c</sup> | 0.927              | 10                              | 0.417     |             |
|                          | Patients                 | 0.184    | 10                                    | 0.200 <sup>c</sup> | 0.888              | 10                              | 0.160     |             |
| Tp3                      | M1-SMA                   | Patients | 0.150                                 | 10                 | 0.200 <sup>c</sup> | 0.958                           | 10        | 0.766       |
|                          | PMd-M1                   | Patients | 0.190                                 | 10                 | 0.200 <sup>c</sup> | 0.890                           | 10        | 0.172       |
|                          | PMd-SMA                  | Patients | 0.180                                 | 10                 | 0.200 <sup>c</sup> | 0.908                           | 10        | 0.270       |
|                          | PMd-PMv                  | Patients | 0.180                                 | 10                 | 0.200 <sup>c</sup> | 0.968                           | 10        | 0.871       |
|                          | M1-SC                    | Patients | 0.168                                 | 10                 | 0.200 <sup>c</sup> | 0.889                           | 10        | 0.167       |
|                          | PMv-SMA                  | Patients | 0.267                                 | 10                 | 0.042              | 0.858                           | 10        | 0.072       |
|                          | Inter-PMd                | Patients | 0.205                                 | 10                 | 0.200 <sup>c</sup> | 0.958                           | 10        | 0.760       |
|                          | Inter-PMv                | Patients | 0.187                                 | 10                 | 0.200 <sup>c</sup> | 0.944                           | 10        | 0.594       |
|                          | Inter-M1                 | Patients | 0.173                                 | 10                 | 0.200 <sup>c</sup> | 0.908                           | 10        | 0.265       |
| Inter-SMA                | Patients                 | 0.137    | 10                                    | 0.200 <sup>c</sup> | 0.945              | 10                              | 0.611     |             |

<sup>a</sup>Lilliefors significance correction.

<sup>b</sup>Shapiro-Wilk test: if sig. >0.05, the data are normal distribution. If it is below 0.05, the data significantly deviate from a normal distribution.

<sup>c</sup>This is a lower bound of the true significance.

GFA, generalized fractional anisotropy; M1, primary motor area; PMd, premotor dorsal area; PMv, premotor ventral area; SC, somato-sensory cortex; SMA, supplementary motor area.
