# Supplementary material
Source: PubMed Central journal article supplement (PMC4575543)
Supplement: Supp_Table2.pdf [file Supp_Table2.pdf]

SUPPLEMENTARY TABLE S2. NORMALITY TEST FOR MTR AT TP1, TP2, AND TP3 FOR PATIENTS AND CONTROLS

| <i>Test of normality</i> |                          |          | <i>Kolmogorov-Smirnov<sup>a</sup></i> |                    |                    | <i>Shapiro-Wilk<sup>b</sup></i> |           |             |
|--------------------------|--------------------------|----------|---------------------------------------|--------------------|--------------------|---------------------------------|-----------|-------------|
|                          | <i>Controls/patients</i> |          | <i>Statistic</i>                      | <i>df</i>          | <i>Sig.</i>        | <i>Statistic</i>                | <i>df</i> | <i>Sig.</i> |
| Tp1                      | M1-SMA                   | Controls | 0.156                                 | 10                 | 0.200 <sup>c</sup> | 0.969                           | 10        | 0.880       |
|                          |                          | Patients | 0.224                                 | 10                 | 0.167              | 0.943                           | 10        | 0.591       |
|                          | PMd-M1                   | Controls | 0.118                                 | 10                 | 0.200 <sup>c</sup> | 0.980                           | 10        | 0.966       |
|                          |                          | Patients | 0.223                                 | 10                 | 0.174              | 0.885                           | 10        | 0.147       |
|                          | PMd-SMA                  | Controls | 0.178                                 | 10                 | 0.200 <sup>c</sup> | 0.952                           | 10        | 0.691       |
|                          |                          | Patients | 0.158                                 | 10                 | 0.200 <sup>c</sup> | 0.924                           | 10        | 0.395       |
|                          | PMd-PMv                  | Controls | 0.132                                 | 10                 | 0.200 <sup>c</sup> | 0.967                           | 10        | 0.861       |
|                          |                          | Patients | 0.253                                 | 10                 | 0.069              | 0.777                           | 10        | 0.008       |
|                          | M1-SC                    | Controls | 0.136                                 | 10                 | 0.200 <sup>c</sup> | 0.962                           | 10        | 0.803       |
|                          |                          | Patients | 0.186                                 | 10                 | 0.200 <sup>c</sup> | 0.924                           | 10        | 0.391       |
|                          | PMv-SMA                  | Controls | 0.148                                 | 10                 | 0.200 <sup>c</sup> | 0.921                           | 10        | 0.363       |
|                          |                          | Patients | 0.274                                 | 10                 | 0.032              | 0.825                           | 10        | 0.029       |
|                          | Inter-PMd                | Controls | 0.094                                 | 10                 | 0.200 <sup>c</sup> | 0.966                           | 10        | 0.852       |
|                          |                          | Patients | 0.157                                 | 10                 | 0.200 <sup>c</sup> | 0.953                           | 10        | 0.707       |
|                          | Inter-PMv                | Controls | 0.183                                 | 10                 | 0.200 <sup>c</sup> | 0.895                           | 10        | 0.192       |
|                          |                          | Patients | 0.198                                 | 10                 | 0.200 <sup>c</sup> | 0.930                           | 10        | 0.449       |
| Inter-M1                 | Controls                 | 0.149    | 10                                    | 0.200 <sup>c</sup> | 0.925              | 10                              | 0.400     |             |
|                          | Patients                 | 0.231    | 10                                    | 0.140              | 0.893              | 10                              | 0.182     |             |
| Inter-SMA                | Controls                 | 0.179    | 10                                    | 0.200 <sup>c</sup> | 0.928              | 10                              | 0.427     |             |
|                          | Patients                 | 0.314    | 10                                    | 0.006              | 0.765              | 10                              | 0.005     |             |
| Tp2                      | M1-SMA                   | Controls | 0.231                                 | 10                 | 0.138              | 0.877                           | 10        | 0.119       |
|                          |                          | Patients | 0.151                                 | 10                 | 0.200 <sup>c</sup> | 0.945                           | 10        | 0.613       |
|                          | PMd-M1                   | Controls | 0.135                                 | 10                 | 0.200 <sup>c</sup> | 0.931                           | 10        | 0.461       |
|                          |                          | Patients | 0.190                                 | 10                 | 0.200 <sup>c</sup> | 0.897                           | 10        | 0.202       |
|                          | PMd-SMA                  | Controls | 0.159                                 | 10                 | 0.200 <sup>c</sup> | 0.968                           | 10        | 0.872       |
|                          |                          | Patients | 0.168                                 | 10                 | 0.200 <sup>c</sup> | 0.953                           | 10        | 0.709       |
|                          | PMd-PMv                  | Controls | 0.198                                 | 10                 | 0.200 <sup>c</sup> | 0.915                           | 10        | 0.314       |
|                          |                          | Patients | 0.200                                 | 10                 | 0.200 <sup>c</sup> | 0.900                           | 10        | 0.221       |
|                          | M1-SC                    | Controls | 0.263                                 | 10                 | 0.048              | 0.847                           | 10        | 0.053       |
|                          |                          | Patients | 0.160                                 | 10                 | 0.200 <sup>c</sup> | 0.931                           | 10        | 0.458       |
|                          | PMv-SMA                  | Controls | 0.141                                 | 10                 | 0.200 <sup>c</sup> | 0.953                           | 10        | 0.708       |
|                          |                          | Patients | 0.155                                 | 10                 | 0.200 <sup>c</sup> | 0.961                           | 10        | 0.802       |
|                          | Inter-PMd                | Controls | 0.148                                 | 10                 | 0.200 <sup>c</sup> | 0.949                           | 10        | 0.660       |
|                          |                          | Patients | 0.134                                 | 10                 | 0.200 <sup>c</sup> | 0.927                           | 10        | 0.422       |
|                          | Inter-PMv                | Controls | 0.196                                 | 10                 | 0.200 <sup>c</sup> | 0.947                           | 10        | 0.631       |
|                          |                          | Patients | 0.145                                 | 10                 | 0.200 <sup>c</sup> | 0.954                           | 10        | 0.720       |
| Inter-M1                 | Controls                 | 0.191    | 10                                    | 0.200 <sup>c</sup> | 0.906              | 10                              | 0.252     |             |
|                          | Patients                 | 0.169    | 10                                    | 0.200 <sup>c</sup> | 0.952              | 10                              | 0.687     |             |
| Inter-SMA                | Controls                 | 0.168    | 10                                    | 0.200 <sup>c</sup> | 0.965              | 10                              | 0.845     |             |
|                          | Patients                 | 0.314    | 10                                    | 0.006              | 0.815              | 10                              | 0.022     |             |
| Tp3                      | M1-SMA                   | Patients | 0.176                                 | 10                 | 0.200 <sup>c</sup> | 0.870                           | 10        | 0.099       |
|                          | PMd-M1                   | Patients | 0.259                                 | 10                 | 0.056              | 0.842                           | 10        | 0.047       |
|                          | PMd-SMA                  | Patients | 0.196                                 | 10                 | 0.200 <sup>c</sup> | 0.959                           | 10        | 0.772       |
|                          | PMd-PMv                  | Patients | 0.122                                 | 10                 | 0.200 <sup>c</sup> | 0.956                           | 10        | 0.738       |
|                          | M1-SC                    | Patients | 0.194                                 | 10                 | 0.200 <sup>c</sup> | 0.871                           | 10        | 0.103       |
|                          | PMv-SMA                  | Patients | 0.175                                 | 10                 | 0.200 <sup>c</sup> | 0.908                           | 10        | 0.270       |
|                          | Inter-PMd                | Patients | 0.422                                 | 10                 | 0.000              | 0.599                           | 10        | 0.000       |
|                          | Inter-PMv                | Patients | 0.297                                 | 10                 | 0.013              | 0.720                           | 10        | 0.002       |
|                          | Inter-M1                 | Patients | 0.350                                 | 10                 | 0.001              | 0.669                           | 10        | 0.000       |
|                          | Inter-SMA                | Patients | 0.356                                 | 10                 | 0.001              | 0.629                           | 10        | 0.000       |

<sup>a</sup>Lilliefors significance correction.

<sup>b</sup>Shapiro-Wilk test: if sig. >0.05, the data are normal distribution. If it is below 0.05, the data significantly deviate from a normal distribution.

<sup>c</sup>This is a lower bound of the true significance.

MTR, magnetization transfer ratio; M1, primary motor area; PMd, premotor dorsal area; PMv, premotor ventral area; SC, somatosensory cortex; SMA, supplementary motor area.
