# Supplementary material
Source: PubMed Central journal article supplement (PMC4575543)
Supplement: Supp_Table3.pdf [file Supp_Table3.pdf]

SUPPLEMENTARY TABLE S3. REPRODUCIBILITY OF TRACT-DERIVED FEATURE (SD, PEAK HEIGHT, AND SKEWNESS) OF GFA AND MTR BETWEEN TP1 AND TP2 IN HEALTHY CONTROLS. PAIRED *t*-TEST ASSESSING THE NULL HYPOTHESIS: TP1 (SD, PEAK HEIGHT, AND SKEWNESS) = TP2 (SD, PEAK HEIGHT, AND SKEWNESS)

|                                        |                         | <i>Controls (n = 10. tp1 vs. tp2). p-Value</i> |            |               |            |                |            |                         |            |                |            |                 |            |                 |            |                |            |                 |            |
|----------------------------------------|-------------------------|------------------------------------------------|------------|---------------|------------|----------------|------------|-------------------------|------------|----------------|------------|-----------------|------------|-----------------|------------|----------------|------------|-----------------|------------|
|                                        |                         | <i>Intrahemispheric</i>                        |            |               |            |                |            | <i>Interhemispheric</i> |            |                |            |                 |            |                 |            |                |            |                 |            |
| <i>ROI<sub>r</sub>-ROI<sub>l</sub></i> | <i>Features GFA/MTR</i> | <i>MI-SMA</i>                                  |            | <i>PMd-MI</i> |            | <i>PMd-SMA</i> |            | <i>PMd-PMv</i>          |            | <i>PMv-SMA</i> |            | <i>CC-m-PMd</i> |            | <i>CC-m-PMv</i> |            | <i>CC-m-MI</i> |            | <i>CC-m-SMA</i> |            |
|                                        |                         | <i>GFA</i>                                     | <i>MTR</i> | <i>GFA</i>    | <i>MTR</i> | <i>GFA</i>     | <i>MTR</i> | <i>GFA</i>              | <i>MTR</i> | <i>GFA</i>     | <i>MTR</i> | <i>GFA</i>      | <i>MTR</i> | <i>GFA</i>      | <i>MTR</i> | <i>GFA</i>     | <i>MTR</i> | <i>GFA</i>      | <i>MTR</i> |
| Mean                                   |                         | 0.672                                          | 0.929      | 0.107         | 0.827      | 0.159          | 0.311      | 0.401                   | 0.932      | 0.249          | 0.516      | 0.679           | 0.548      | 0.098           | 0.795      | 0.313          | 0.716      | 0.573           | 0.692      |
| SD                                     |                         | 0.807                                          | 0.521      | 0.732         | 0.286      | 0.314          | 0.332      | 0.650                   | 0.767      | 0.390          | 0.674      | 0.669           | 0.439      | 0.561           | 0.543      | 0.346          | 0.337      | 0.209           | 0.912      |
| Peak height                            |                         | 0.065                                          | 0.131      | 0.519         | 0.348      | 0.607          | 0.824      | 0.713                   | 0.988      | 0.405          | 0.635      | 0.124           | 0.784      | 0.240           | 0.971      | 0.024          | 0.250      | 0.217           | 0.066      |
| Skewness                               |                         | 0.004                                          | 0.611      | 0.645         | 0.624      | 0.389          | 0.203      | 0.159                   | 0.449      | 0.782          | 0.086      | 0.881           | 0.595      | 0.977           | 0.845      | 0.467          | 0.501      | 0.662           | 0.432      |

*p* < 0.05 is considered significantly different.

CC-m, corpus callosum-midline; GFA, generalized fractional anisotropy; ROI, region of interest; SD, standard deviation.
