# Supplementary material
Source: PubMed Central journal article supplement (PMC4575543)
Supplement: Supp_Table4.pdf [file Supp_Table4.pdf]

SUPPLEMENTARY TABLE S4. REPRODUCIBILITY OF TRACT-DERIVED FEATURE (SD, PEAK HEIGHT, AND SKEWNESS) OF GFA AND MTR BETWEEN TP1 AND TP2 IN HEALTHY CONTROLS. PERCENTAGE DIFFERENCES (RELATIVE CHANGE [%]) IN TRACT-DERIVED FEATURE (SD, PEAK HEIGHT, AND SKEWNESS) AND MEAN GFA/MTR BETWEEN TP1 AND TP2 IN HEALTHY CONTROLS

|                                        |                | <i>Controls (n = 10. tp1 vs. tp2). Relative change (%). Positive (negative): increase (decrease)</i> |            |                |            |                 |            |                |            |                |            |            |             |
|----------------------------------------|----------------|------------------------------------------------------------------------------------------------------|------------|----------------|------------|-----------------|------------|----------------|------------|----------------|------------|------------|-------------|
|                                        |                | <i>Intrahemispheric</i>                                                                              |            |                |            |                 |            |                |            |                |            |            |             |
| <i>ROI<sub>1</sub>-ROI<sub>2</sub></i> |                | <i>MI-SMA</i>                                                                                        |            | <i>PMd-MI</i>  |            | <i>PMd-SMA</i>  |            | <i>PMd-PMv</i> |            | <i>PMv-SMA</i> |            |            |             |
| <i>Features</i>                        | <i>GFA/MTR</i> | <i>GFA</i>                                                                                           | <i>MTR</i> | <i>GFA</i>     | <i>MTR</i> | <i>GFA</i>      | <i>MTR</i> | <i>GFA</i>     | <i>MTR</i> | <i>GFA</i>     | <i>MTR</i> | <i>GFA</i> | <i>MTR</i>  |
| Mean                                   |                | 1 ± 3                                                                                                | 0 ± 7      | 2 ± 3          | 1 ± 5      | -10 ± 37        | -7 ± 33    | 1 ± 3          | 0 ± 5      | 1 ± 3          | 0 ± 5      | 2 ± 4      | -1 ± 6      |
| SD                                     |                | -2 ± 13                                                                                              | -4 ± 25    | 1 ± 12         | 5 ± 28     | 7 ± 32          | 15 ± 40    | 1 ± 20         | -2 ± 25    | 1 ± 20         | -2 ± 25    | -13 ± 36   | 4 ± 23      |
| Peak Height                            |                | 32 ± 23                                                                                              | 37 ± 95    | 2 ± 233        | -75 ± 305  | -42 ± 181       | 360 ± 653  | 81 ± 106       | 750 ± 1401 | 81 ± 106       | 750 ± 1401 | 233 ± 418  | -991 ± 3506 |
| Skewness                               |                | 8 ± 19                                                                                               | 11 ± 21    | -8 ± 31        | -27 ± 45   | -40 ± 94        | -244 ± 690 | -1 ± 30        | -6 ± 36    | -1 ± 30        | -6 ± 36    | 6 ± 35     | 4 ± 29      |
|                                        |                | <i>Intrahemispheric</i>                                                                              |            |                |            |                 |            |                |            |                |            |            |             |
| <i>ROI<sub>1</sub>-ROI<sub>2</sub></i> |                | <i>CC-m-PMd</i>                                                                                      |            | <i>CC-m-MI</i> |            | <i>CC-m-SMA</i> |            |                |            |                |            |            |             |
| <i>Features</i>                        | <i>GFA/MTR</i> | <i>GFA</i>                                                                                           | <i>MTR</i> | <i>GFA</i>     | <i>MTR</i> | <i>GFA</i>      | <i>MTR</i> | <i>GFA</i>     | <i>MTR</i> | <i>GFA</i>     | <i>MTR</i> | <i>GFA</i> | <i>MTR</i>  |
| Mean                                   |                | -1 ± 9                                                                                               | -1 ± 6     | -4 ± 7         | 0 ± 4      | -1 ± 4          | 0 ± 5      | 0 ± 4          | 1 ± 5      | 0 ± 4          | 1 ± 5      | 0 ± 4      | 1 ± 5       |
| SD                                     |                | 1 ± 12                                                                                               | -7 ± 56    | -5 ± 21        | -5 ± 62    | -4 ± 15         | 6 ± 48     | 11 ± 29        | -5 ± 29    | 11 ± 29        | -5 ± 29    | 11 ± 29    | -5 ± 29     |
| Peak Height                            |                | 162 ± 297                                                                                            | -27 ± 178  | 124 ± 158      | -76 ± 285  | 120 ± 202       | -150 ± 723 | 48 ± 107       | 877 ± 2758 | 48 ± 107       | 877 ± 2758 | 48 ± 107   | 877 ± 2758  |
| Skewness                               |                | -13 ± 24                                                                                             | -32 ± 105  | 8 ± 26         | -34 ± 107  | 13 ± 11         | -42 ± 92   | -33 ± 70       | -13 ± 21   | -33 ± 70       | -13 ± 21   | -33 ± 70   | -13 ± 21    |

Positive (negative) value denotes an increase (decrease) in the GFA/MTR measure in control relative to the first time point (tp1).
